# Supplementary material for: A Comparison of Feathers and Oral Swab Samples as DNA Sources for Molecular Sexing in Companion Birds
Source: MDPI journal article supplement (doi:10.3390/ani13030525), 2023-02-02
Supplement: s1 [file s1]

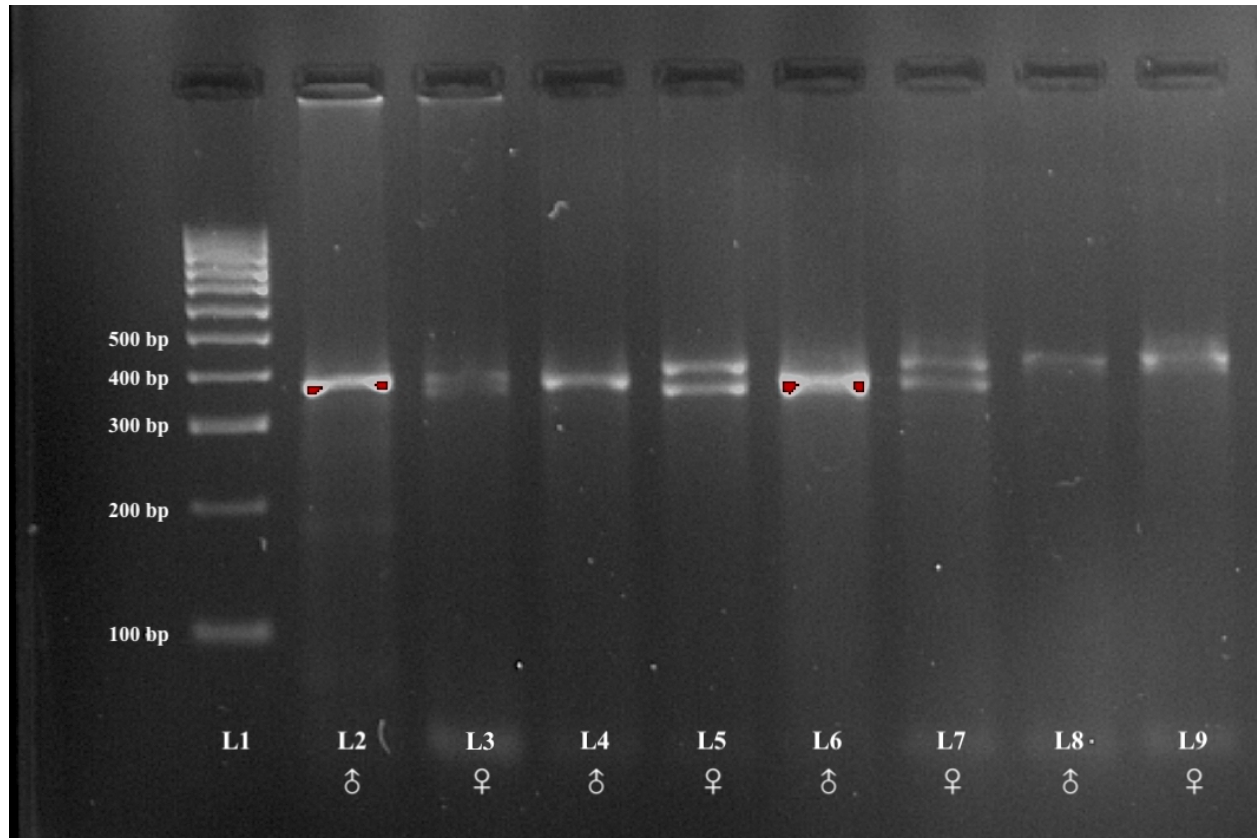

**Figure S1.** PCR results from oral swabs samples

Legend: L1 – Size standard (100-bp DNA ladder), ♂ - male, ♀ - female, L2 and L3 common pigeons (*Columba livia*), L4 and L5 scarlet-chested parrots (*Neophema splendida*), L6 and L7 rose-ringed parakeets and lovebirds (*Agapornis spp.*).

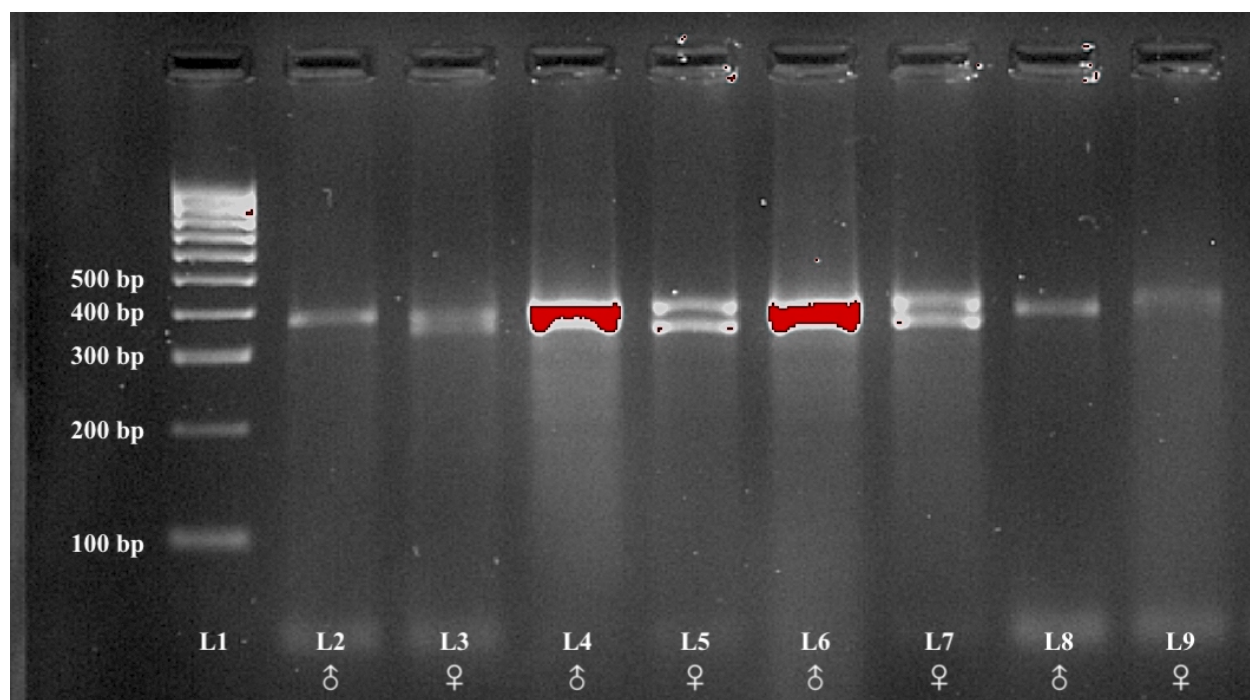

**Figure S2.** PCR results from feathers samples

Legend: L1 – Size standard (100-bp DNA ladder), ♂ - male, ♀ - female, L2 and L3 common pigeons (*Columba livia*), L4 and L5 scarlet-chested parrots (*Neophema splendida*), L6 and L7 rose-ringed parakeets and lovebirds (*Agapornis spp.*)
